# Supplementary material
Source: Springer Nature journal article supplement (https://www.springermedizin.de/resource/supplementary/13024_2014_541_MOESM2_ESM.pdf/9644352)
Supplement: MOESM2 [file 9644352]

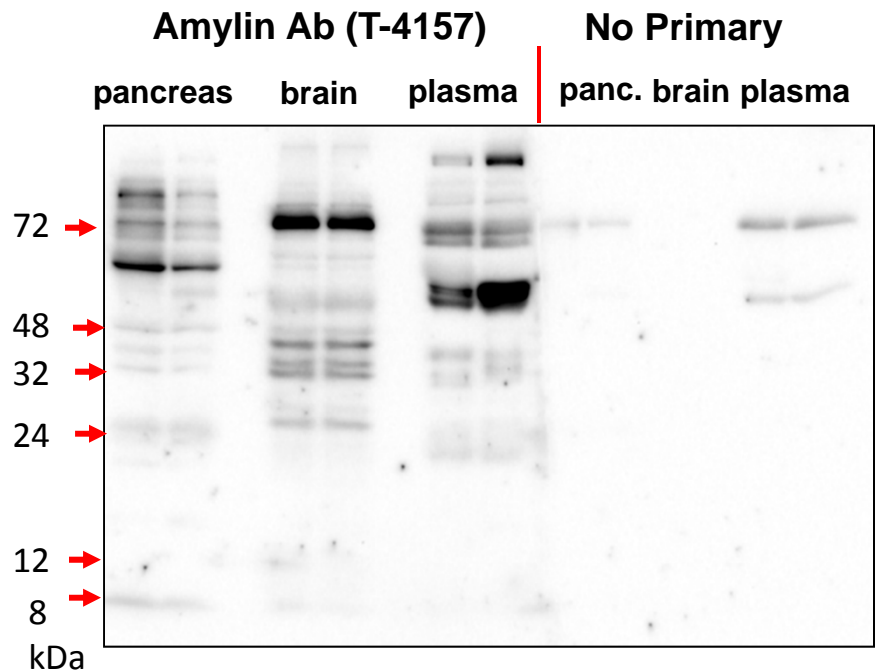

Matched pancreas and brain supernatant samples and plasma from the same HIP rats (N=2) were investigated for the presence of oligomerized amylin with the T-4157 anti-amylin antibody (left panel).

To verify specific staining of protein bands, samples were loaded onto a gel in duplicate and after blotting and blocking, the membrane was cut and one half was incubated with the anti-amylin antibody while the other half was incubated in the absence of the primary antibody. Both halves were then incubated with the secondary antibody and developed and imaged together (right panel).

**Fig S2**
